# Supplementary material for: The histone code reader PHD finger protein 7 controls sex-linked disparities in gene expression and malignancy in Drosophila
Source: PubMed Central journal article supplement — Sci Adv. 2019 Aug 14;5(8):eaaw7965. doi: 10.1126/sciadv.aaw7965 (PMC6693905; doi:10.1126/sciadv.aaw7965), 2019-08-14
Supplement: aaw7965_SM.pdf [file aaw7965_SM.pdf]

## Supplementary Materials for

### **The histone code reader PHD finger protein 7 controls sex-linked disparities in gene expression and malignancy in *Drosophila***

Cristina Molnar, Jan Peter Heinen, Jose Reina, Salud Llamazares, Emilio Palumbo, Alessandra Breschi, Marina Gay, Laura Villarreal, Marta Vilaseca, Giulia Pollarolo, Cayetano Gonzalez\*

\*Corresponding author. Email: gonzalez@irbbarcelona.org

Published 14 August 2019, *Sci. Adv.* **5**, eaaw7965 (2019)  
DOI: 10.1126/sciadv.aaw7965

#### **This PDF file includes:**

Fig. S1. brat tumors do not present sex-dependent dimorphism.

Fig. S2. mbt tumor size is sex dependent.

Fig. S3. Loss of Phf7 reduces the expression of mbt M-tSDS genes and increases the expression of mbt F-tSDS genes in male tissue.

Table S1. Proteomic sex-linked dimorphic signatures.

Table S2. GO terms enriched in the M-pSDS and the F-pSDS.

Table S3. Relative expression levels of L(3)mbt and other components of the LINT and Myb/Muv/Dream complexes between male and female wild-type brain lobes.

Table S4. Sex-dependent dysregulation of MBTS genes in *l(3)mbt<sup>ts1</sup>* tumors versus wild-type and in *Phf7<sup>ΔN2</sup>; l(3)mbt<sup>ts1</sup>* versus *l(3)mbt<sup>ts1</sup>*.

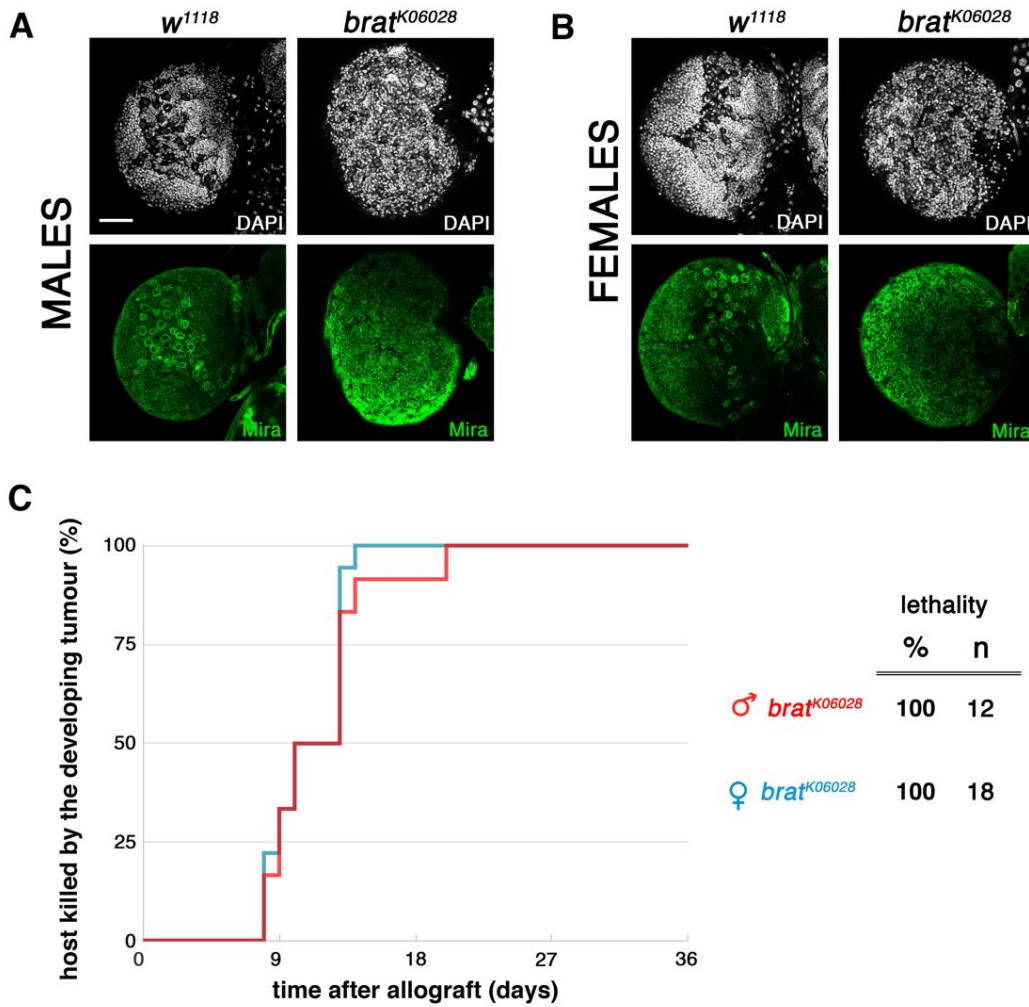

**Fig. S1. *brat* tumors do not present sex-dependent dimorphism.** (A-B) Dorsal views of larval brain lobes from male (A) and female (B) control (*w<sup>1118</sup>*) and *brat* mutant (*brat<sup>K06028</sup>*) larvae, stained with DAPI (grey) and anti-Miranda (green). The extent of tumours spreading over the brain lobe is indistinguishable between male and female larvae. Scale bar = 50  $\mu$ m. (C) Tumour growth rate and host lethality caused by allografted *brat<sup>K06028</sup>* male (red) and female (blue) brain lobes, shown as the fraction of allografted hosts that are killed by the developing tumour as a function of time after allograft. Male and female implants kill hosts at same rate and time.

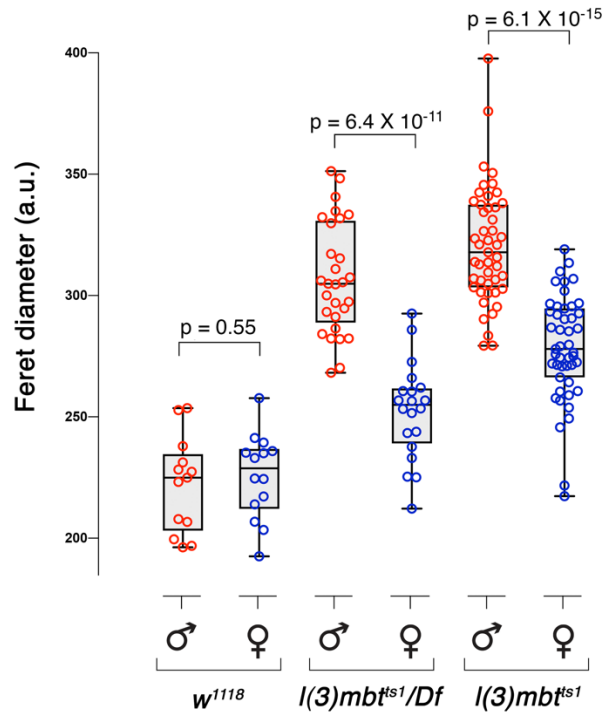

**Fig. S2. mbt tumor size is sex dependent.** Box-plot of maximum brain Feret diameters in male (red) and female (blue), control (*w<sup>1118</sup>*) and mbt mutant (*l(3)mbt<sup>ts1</sup>/Df*, and *l(3)mbt<sup>ts1</sup>*) larvae. Maximum Feret diameters are significantly greater in male than in female tumour samples.

*Phf7*<sup>ΔN2</sup>; *l(3)mbt*<sup>ts1</sup> vs *l(3)mbt*<sup>ts1</sup>

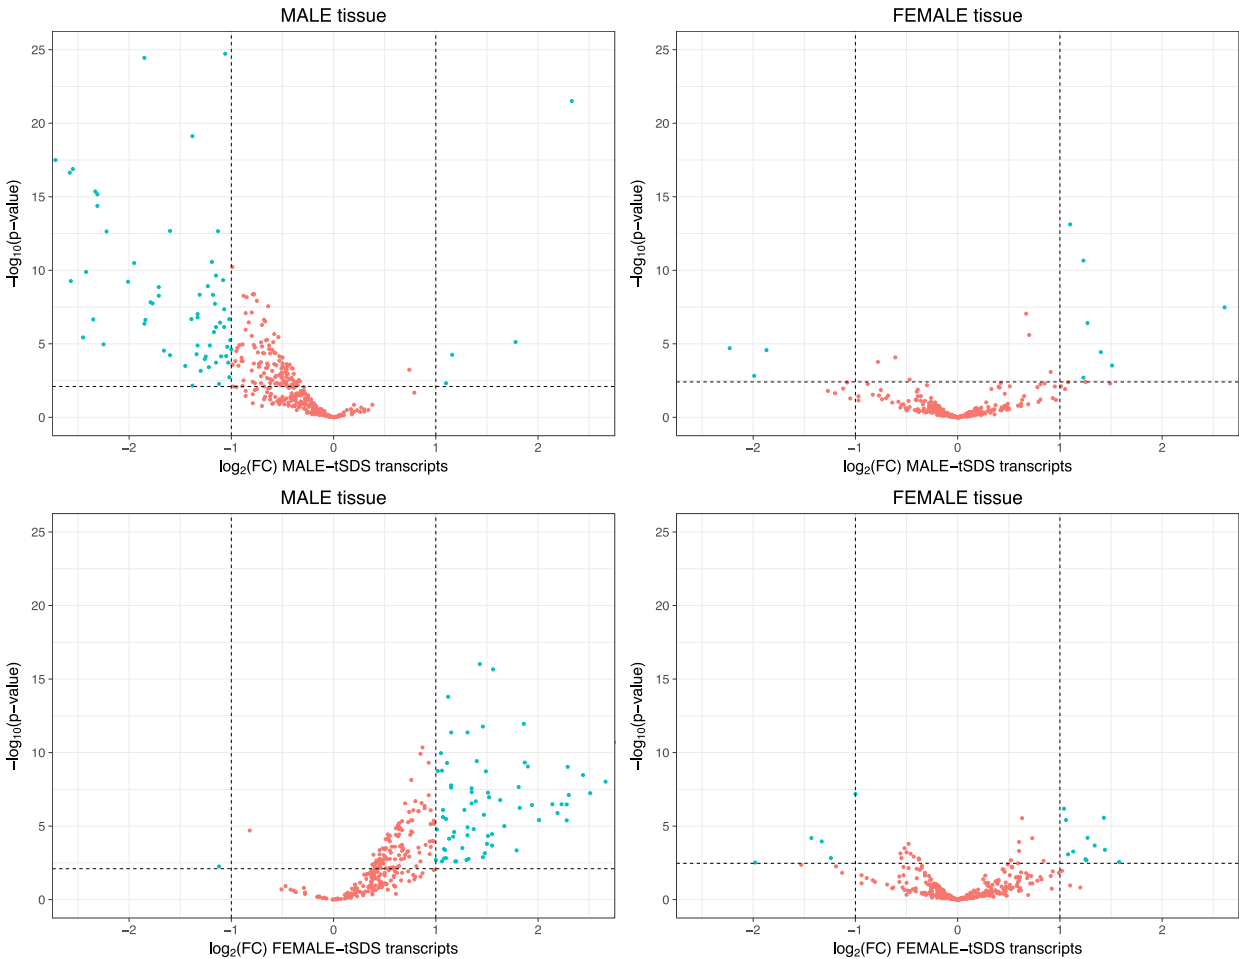

**Fig. S3. Loss of *Phf7* reduces the expression of mbt M-tSDS genes and increases the expression of mbt F-tSDS genes in male tissue.** Volcano plots showing the significance of the fold change in expression level of M- and F-tSDS genes between *Phf7*<sup>ΔN2</sup>; *l(3)mbt*<sup>ts1</sup> and *l(3)mbt*<sup>ts1</sup> in male and female samples. The horizontal dotted line corresponds to negative log10 of the p-value associated to the significance threshold (FDR=0.05). Points above this line and with log2(FC) values greater than 1 and smaller than -1 are significantly upregulated and downregulated respectively in *Phf7*<sup>ΔN2</sup>; *l(3)mbt*<sup>ts1</sup> compared to *l(3)mbt*<sup>ts1</sup> (blue). Genes whose differential expression is not significant are coloured in red. Genes presenting extreme FC values are not included in the plots to help visualisation (<15% of the total tSDS genes). In male tissue, most M-tSDS and F-tSDS genes are downregulated and upregulated respectively, while in female tissues the extend of dysregulation is very low.

**Table S1. Proteomic sex-linked dimorphic signatures.**

| 66 M-pSDS   |                       | 61 F-pSDS   |                |
|-------------|-----------------------|-------------|----------------|
| FBgn0033749 | <i>achi</i>           | FBgn0004552 | <i>Akh</i>     |
| FBgn0000047 | <i>Act88F</i>         | FBgn0032076 | <i>Argl</i>    |
| FBgn0036622 | <i>Agpat4</i>         | FBgn0039007 | <i>CCAP</i>    |
| FBgn0250816 | <i>AGO3</i>           | FBgn0034443 | <i>cer</i>     |
| FBgn0016762 | <i>angel</i>          | FBgn0032805 | <i>CG10337</i> |
| FBgn0029094 | <i>asf1</i>           | FBgn0030292 | <i>CG11752</i> |
| FBgn0000147 | <i>aurA</i>           | FBgn0036599 | <i>CG13044</i> |
| FBgn0014127 | <i>barr</i>           | FBgn0026879 | <i>CG13364</i> |
| FBgn0045863 | <i>blood\ORF</i>      | FBgn0040660 | <i>CG13551</i> |
| FBgn0030501 | <i>BthD</i>           | FBgn0036835 | <i>CG14075</i> |
| FBgn0004107 | <i>Cdk2</i>           | FBgn0038421 | <i>CG17931</i> |
| FBgn0010620 | <i>CG10939</i>        | FBgn0029608 | <i>CG3091</i>  |
| FBgn0039733 | <i>CG11504</i>        | FBgn0051051 | <i>CG31051</i> |
| FBgn0029754 | <i>CG15930</i>        | FBgn0085446 | <i>CG34417</i> |
| FBgn0034931 | <i>CG2812</i>         | FBgn0029708 | <i>CG3556</i>  |
| FBgn0051365 | <i>CG31365</i>        | FBgn0262858 | <i>CG43222</i> |
| FBgn0051373 | <i>CG31373</i>        | FBgn0263994 | <i>CG43737</i> |
| FBgn0052856 | <i>CG32856</i>        | FBgn0031306 | <i>CG4577</i>  |
| FBgn0027521 | <i>CG3679</i>         | FBgn0030575 | <i>CG5321</i>  |
| FBgn0263776 | <i>CG43693</i>        | FBgn0031913 | <i>CG5958</i>  |
| FBgn0036522 | <i>CG7372</i>         | FBgn0038407 | <i>CG6126</i>  |
| FBgn0040477 | <i>cid</i>            | FBgn0032287 | <i>CG6415</i>  |
| FBgn0038612 | <i>cona</i>           | FBgn0038641 | <i>CG7708</i>  |
| FBgn0020496 | <i>CtBP</i>           | FBgn0033717 | <i>CG8839</i>  |
| FBgn0000392 | <i>cup</i>            | FBgn0026084 | <i>cib</i>     |
| FBgn0026085 | <i>dgt4</i>           | FBgn0000377 | <i>crn</i>     |
| FBgn0005696 | <i>DNApol-alpha73</i> | FBgn0261808 | <i>cu</i>      |
| FBgn0015929 | <i>dpa</i>            | FBgn0034136 | <i>DAT</i>     |
| FBgn0000928 | <i>fs(1)Yb</i>        | FBgn0033159 | <i>Dscaml</i>  |
| FBgn0001086 | <i>fzy</i>            | FBgn0000564 | <i>Eh</i>      |
| FBgn0036850 | <i>Gem2</i>           | FBgn0000715 | <i>FMRFa</i>   |
| FBgn0053852 | <i>His1:CG33852</i>   | FBgn0259108 | <i>futsch</i>  |
| FBgn0001198 | <i>His2B</i>          | FBgn0035160 | <i>hng3</i>    |
| FBgn0001199 | <i>His3</i>           | FBgn0001224 | <i>Hsp23</i>   |
| FBgn0001200 | <i>His4</i>           | FBgn0001227 | <i>Hsp67Ba</i> |
| FBgn0030994 | <i>HP1D3csd</i>       | FBgn0031294 | <i>IA-2</i>    |
| FBgn0283521 | <i>lola</i>           | FBgn0029994 | <i>Ldsdh1</i>  |
| FBgn0033845 | <i>mars</i>           | FBgn0039114 | <i>Lsd-1</i>   |
| FBgn0260986 | <i>mei-38</i>         | FBgn0030608 | <i>Lsd-2</i>   |
| FBgn0264695 | <i>Mhc</i>            | FBgn0015766 | <i>Msr-110</i> |
| FBgn0021776 | <i>mira</i>           | FBgn0002868 | <i>MtnA</i>    |
| FBgn0002772 | <i>Mlc1</i>           | FBgn0035092 | <i>Nplp1</i>   |

|                             |                           |                             |                     |
|-----------------------------|---------------------------|-----------------------------|---------------------|
| FBgn0002773                 | <i>Mlc2</i>               | FBgn0004959                 | <i>phm</i>          |
| FBgn0013717                 | <i>not</i>                | FBgn0005626                 | <i>ple</i>          |
| <a href="#">FBgn0032651</a> | <a href="#">Oli</a>       | FBgn0003137                 | <i>Ppn</i>          |
| FBgn0286788                 | <i>Orc1</i>               | FBgn0030208                 | <i>PPP4R2r</i>      |
| FBgn0015270                 | <i>Orc2</i>               | FBgn0045038                 | <i>Proc</i>         |
| FBgn0003041                 | <i>pbl</i>                | FBgn0011828                 | <i>Pxn</i>          |
| FBgn0051453                 | <i>pch2</i>               | FBgn0016715                 | <i>Reg-2</i>        |
| FBgn0005655                 | <i>PCNA</i>               | FBgn0015521                 | <i>RpS21</i>        |
| FBgn0267727                 | <i>Pen</i>                | FBgn0003312                 | <i>sad</i>          |
| FBgn0031091                 | <i>Phf7</i>               | FBgn0030966                 | <i>shop</i>         |
| FBgn0030318                 | <i>rho-4</i>              | FBgn0025625                 | <i>Sik2</i>         |
| <a href="#">FBgn0038853</a> | <a href="#">RhoGAP93B</a> | FBgn0039296                 | <i>Sil1</i>         |
| FBgn0011704                 | <i>RnrS</i>               | FBgn0051163                 | <i>SKIP</i>         |
| FBgn0066304                 | <i>Rpp20</i>              | FBgn0086917                 | <i>spok</i>         |
| FBgn0015295                 | <i>Shark</i>              | FBgn0035028                 | <i>Start1</i>       |
| FBgn0265523                 | <i>Smr</i>                | FBgn0004575                 | <i>Syn</i>          |
| FBgn0265045                 | <i>Strn-Mlck</i>          | FBgn0028671                 | <i>Vha100-1</i>     |
| FBgn0004117                 | <i>Tm2</i>                | <a href="#">FBgn0029906</a> | <a href="#">xit</a> |
| FBgn0033027                 | <i>TpnC4</i>              | FBgn0265767                 | <i>zyd</i>          |
| FBgn0029752                 | <i>TrxT</i>               |                             |                     |
| FBgn0283442                 | <i>vas</i>                |                             |                     |
| FBgn0001983                 | <i>wor</i>                |                             |                     |
| FBgn0042693                 | <i>wrd</i>                |                             |                     |
| FBgn0030805                 | <i>wus</i>                |                             |                     |

FlybaseID and Symbol of the proteins up-regulated in male versus female (M-pSDS) and in female versus male (F-pSDS) mbt tumours. All of these proteins, except those in blue, were detected by 2 or more unique peptides.

**Table S2. GO terms enriched in the M-pSDS and the F-pSDS.**

| <b>M-pSDS</b>                       |                |
|-------------------------------------|----------------|
| <i>GO term - Biological Process</i> | <i>p-value</i> |
| mitotic spindle organization        | 2.23E-07       |
| DNA replication initiation          | 1.90E-04       |
| nucleosome assembly                 | 5.10E-04       |
| flight                              | 1.69E-03       |
| DNA replication                     | 2.31E-03       |
| DNA-dependent DNA replication       | 3.02E-03       |
| mitotic chromosome condensation     | 6.23E-03       |
| intracellular mRNA localization     | 6.77E-03       |
| neurogenesis                        | 8.26E-03       |
| kinetochore assembly                | 2.06E-02       |
| muscle thin filament assembly       | 2.57E-02       |
| chromatin assembly or disassembly   | 2.97E-02       |
| muscle contraction                  | 3.57E-02       |
| chromosome organization             | 4.09E-02       |

  

| <b>F-pSDS</b>                       |                |
|-------------------------------------|----------------|
| <i>GO term - Biological Process</i> | <i>p-value</i> |
| ecdysone biosynthetic process       | 1.47E-03       |
| oxidation-reduction process         | 2.17E-03       |
| lipid transport                     | 4.64E-03       |
| positive regulation of heart rate   | 8.89E-03       |
| adult locomotory behavior           | 2.74E-02       |
| response to heat                    | 3.68E-02       |

Gene Ontology terms that are significantly enriched in the M-pSDS and the F-pSDS signatures (p values < 0.05).

**Table S3. Relative expression levels of L(3)mbt and other components of the LINT and Myb/Muv/Dream complexes between male and female wild-type brain lobes.**

| Complex | Flybase ID  | Gene Symbol    | Wild-type brain lobes<br>male versus female |          |                    |          |
|---------|-------------|----------------|---------------------------------------------|----------|--------------------|----------|
|         |             |                | FC                                          | log2(FC) | pval               | Adj pval |
|         | FBgn0002441 | <i>l(3)mbt</i> | 1.023                                       | 0.033    | 0.672              | 0.762    |
| LINT    | FBgn0261573 | <i>CoRest</i>  | 1.032                                       | 0.045    | 0.051              | 0.101    |
| LINT    | FBgn0030274 | <i>Lint-1</i>  | 1.418                                       | 0.504    | 0.204              | 0.309    |
| dREAM   | FBgn0263979 | <i>Caf1-55</i> | 1.354                                       | 0.437    | 2X10 <sup>-4</sup> | 0.001    |
| dREAM   | FBgn0263979 | <i>Caf1-55</i> | 1.378                                       | 0.462    | 0.001              | 0.003    |
| dREAM   | FBgn0011763 | <i>Dp</i>      | 1.003                                       | 0.005    | 0.932              | 0.954    |
| dREAM   | FBgn0011766 | <i>E2f1</i>    | 0.947                                       | -0.078   | 0.461              | 0.578    |
| dREAM   | FBgn0024371 | <i>E2f2</i>    | 1.035                                       | 0.050    | 0.555              | 0.663    |
| dREAM   | FBgn0029800 | <i>lin-52</i>  | 1.145                                       | 0.196    | 0.201              | 0.305    |
| dREAM   | FBgn0033846 | <i>mip120</i>  | 1.063                                       | 0.088    | 0.010              | 0.028    |
| dREAM   | FBgn0023509 | <i>mip130</i>  | 0.929                                       | -0.106   | 0.280              | 0.395    |
| dREAM   | FBgn0023509 | <i>mip130</i>  | 1.120                                       | 0.164    | 0.134              | 0.221    |
| dREAM   | FBgn0034430 | <i>mip40</i>   | 1.092                                       | 0.127    | 0.048              | 0.098    |
| dREAM   | FBgn0002914 | <i>Myb</i>     | 1.081                                       | 0.113    | 0.321              | 0.438    |
| dREAM   | FBgn0015799 | <i>Rbf</i>     | 0.928                                       | -0.108   | 0.183              | 0.284    |
| dREAM   | FBgn0038390 | <i>Rbf2</i>    | 1.046                                       | 0.065    | 0.564              | 0.671    |
| others  | FBgn0003334 | <i>Scm</i>     | 1.002                                       | 0.003    | 0.960              | 0.974    |
| others  | FBgn0004837 | <i>Su(H)</i>   | 0.995                                       | -0.007   | 0.896              | 0.929    |

None of these proteins is expressed at a significant different rate in male versus female samples using an adjusted p-value cut off of 0.05 and a FC <0.67 (down) or FC >1.5 (up).



**Table S4. Sex-dependent dysregulation of MBTS genes in *l(3)mbt<sup>ts1</sup>* tumors versus wild-type and in *Phf7<sup>ΔN2</sup>*; *l(3)mbt<sup>ts1</sup>* versus *l(3)mbt<sup>ts1</sup>*.**

|                        |                    | Up-regulated in<br>ts1 compared to wt |         | Down-regulated in<br>Phf7_ts1 compared to ts1 |         |
|------------------------|--------------------|---------------------------------------|---------|-----------------------------------------------|---------|
| 100 MBTS               |                    | MALES                                 | FEMALES | MALES                                         | FEMALES |
| <b>Germline genes*</b> |                    |                                       |         |                                               |         |
| FBgn0000146            | <i>aub</i>         | yes                                   | yes     | no                                            | no      |
| FBgn0004581            | <i>bgn</i>         | yes                                   | yes     | no                                            | no      |
| FBgn0029754            | <i>CG15930</i>     | yes                                   | yes     | no                                            | no      |
| FBgn0052313            | <i>CG32313</i>     | yes                                   | yes     | no                                            | no      |
| FBgn0038191            | <i>CG9925</i>      | yes                                   | yes     | no                                            | no      |
| FBgn0038612            | <i>cona</i>        | yes                                   | yes     | no                                            | no      |
| FBgn0011761            | <i>dhd</i>         | yes                                   | yes     | no                                            | no      |
| FBgn0000928            | <i>fs(1)Yb</i>     | yes                                   | yes     | no                                            | no      |
| FBgn0023441            | <i>fus</i>         | no                                    | no      | no                                            | no      |
| FBgn0010097            | <i>gammaTub37C</i> | yes                                   | yes     | no                                            | no      |
| FBgn0001120            | <i>gnu</i>         | yes                                   | yes     | no                                            | no      |
| FBgn0029977            | <i>hdm</i>         | yes                                   | yes     | no                                            | no      |
| FBgn0034098            | <i>krimp</i>       | yes                                   | yes     | no                                            | no      |
| FBgn0014342            | <i>mia</i>         | yes                                   | yes     | no                                            | no      |
| FBgn0262598            | <i>mtsh</i>        | yes                                   | yes     | no                                            | no      |
| FBgn0002962            | <i>nos</i>         | yes                                   | yes     | no                                            | no      |
| FBgn0004872            | <i>piwi</i>        | yes                                   | yes     | no                                            | no      |
| FBgn0261987            | <i>Pxt</i>         | yes                                   | yes     | no                                            | no      |
| FBgn0051755            | <i>SoYb</i>        | yes                                   | yes     | no                                            | no      |
| FBgn0003527            | <i>stil</i>        | yes                                   | yes     | no                                            | no      |
| FBgn0052088            | <i>sun</i>         | yes                                   | yes     | no                                            | no      |
| FBgn0003655            | <i>swa</i>         | yes                                   | yes     | no                                            | no      |
| FBgn0033921            | <i>tej</i>         | yes                                   | yes     | no                                            | no      |
| FBgn0037751            | <i>topi</i>        | yes                                   | yes     | no                                            | no      |
| FBgn0029752            | <i>TrxT</i>        | yes                                   | yes     | no                                            | no      |
| FBgn0283442            | <i>vas</i>         | yes                                   | yes     | no                                            | no      |
| FBgn0283545            | <i>vilya</i>       | yes                                   | yes     | no                                            | no      |
| FBgn0024177            | <i>zpg</i>         | yes                                   | yes     | no                                            | no      |

**Others**

|             |                |     |     |     |     |
|-------------|----------------|-----|-----|-----|-----|
| FBgn0034075 | <i>Asph</i>    | yes | yes | no  | no  |
| FBgn0036622 | <i>Agpat4</i>  | yes | yes | no  | no  |
| FBgn0031255 | <i>BBS8</i>    | yes | yes | no  | no  |
| FBgn0040487 | <i>BobA</i>    | yes | no  | yes | no  |
| FBgn0261053 | <i>Cad86C</i>  | no  | no  | no  | no  |
| FBgn0036369 | <i>CG10089</i> | yes | yes | no  | no  |
| FBgn0038431 | <i>CG10405</i> | yes | yes | no  | no  |
| FBgn0032520 | <i>CG10859</i> | yes | yes | no  | no  |
| FBgn0033174 | <i>CG11125</i> | yes | yes | no  | no  |
| FBgn0031232 | <i>CG11617</i> | yes | yes | no  | no  |
| FBgn0030551 | <i>CG11674</i> | yes | yes | no  | no  |
| FBgn0030721 | <i>CG12698</i> | yes | yes | no  | no  |
| FBgn0037078 | <i>CG12971</i> | yes | yes | no  | no  |
| FBgn0034966 | <i>CG13563</i> | yes | yes | no  | no  |
| FBgn0031254 | <i>CG13692</i> | yes | yes | no  | no  |
| FBgn0033374 | <i>CG13741</i> | yes | yes | no  | no  |
| FBgn0031844 | <i>CG13771</i> | yes | yes | no  | no  |
| FBgn0031677 | <i>CG14036</i> | yes | yes | no  | no  |
| FBgn0036331 | <i>CG14117</i> | yes | yes | no  | no  |
| FBgn0033274 | <i>CG14757</i> | yes | yes | no  | no  |
| FBgn0038311 | <i>CG14864</i> | yes | yes | no  | no  |
| FBgn0035431 | <i>CG14968</i> | yes | no  | yes | no  |
| FBgn0038051 | <i>CG17207</i> | yes | yes | no  | no  |
| FBgn0014931 | <i>CG2678</i>  | yes | no  | no  | yes |
| FBgn0050380 | <i>CG30380</i> | yes | yes | no  | no  |
| FBgn0051205 | <i>CG31205</i> | yes | yes | no  | no  |
| FBgn0051373 | <i>CG31373</i> | yes | yes | no  | no  |
| FBgn0023525 | <i>CG3191</i>  | yes | yes | no  | no  |
| FBgn0051997 | <i>CG31997</i> | no  | yes | no  | no  |
| FBgn0052006 | <i>CG32006</i> | yes | yes | no  | no  |
| FBgn0052436 | <i>CG32436</i> | yes | yes | no  | no  |
| FBgn0052437 | <i>CG32437</i> | yes | yes | no  | no  |
| FBgn0052440 | <i>CG32440</i> | yes | yes | no  | no  |
| FBgn0052483 | <i>CG32483</i> | yes | yes | no  | no  |
| FBgn0052625 | <i>CG32625</i> | yes | yes | no  | no  |
| FBgn0053978 | <i>CG33978</i> | yes | yes | no  | no  |
| FBgn0259140 | <i>CG42255</i> | yes | no  | no  | no  |

|             |                |     |    |     |    |
|-------------|----------------|-----|----|-----|----|
| FBgn0263256 | <i>CG43394</i> | yes | no | yes | no |
|-------------|----------------|-----|----|-----|----|

|             |                  |     |     |     |    |
|-------------|------------------|-----|-----|-----|----|
| FBgn0038290 | <i>CG6912</i>    | no  | no  | no  | no |
| FBgn0038575 | <i>CG7208</i>    | yes | yes | no  | no |
| FBgn0033373 | <i>CG8080</i>    | no  | no  | no  | no |
| FBgn0037721 | <i>CG9427</i>    | yes | yes | no  | no |
| FBgn0034850 | <i>CG9875</i>    | yes | yes | no  | no |
| FBgn0031451 | <i>CG9961</i>    | yes | yes | no  | no |
| FBgn0052582 | <i>CR32582</i>   | yes | yes | no  | no |
| FBgn0010317 | <i>CycJ</i>      | yes | yes | no  | no |
| FBgn0030607 | <i>dob</i>       | yes | yes | no  | no |
| FBgn0039622 | <i>eIF4E-6</i>   | yes | yes | no  | no |
| FBgn0000658 | <i>fj</i>        | yes | no  | no  | no |
| FBgn0004652 | <i>fru</i>       | no  | no  | no  | no |
| FBgn0040323 | <i>GNBP1</i>     | yes | yes | no  | no |
| FBgn0040321 | <i>GNBP3</i>     | no  | no  | no  | no |
| FBgn0030994 | <i>HP1D3csd</i>  | yes | yes | no  | no |
| FBgn0260874 | <i>Ir76a</i>     | yes | yes | no  | no |
| FBgn0010482 | <i>l(2)01289</i> | yes | yes | yes | no |
| FBgn0025578 | <i>Lcp9</i>      | yes | yes | yes | no |
| FBgn0011653 | <i>mas</i>       | yes | no  | no  | no |
| FBgn0052580 | <i>Muc14A</i>    | yes | yes | no  | no |
| FBgn0034797 | <i>nahoda</i>    | no  | no  | no  | no |
| FBgn0039564 | <i>Nep7</i>      | yes | yes | no  | no |
| FBgn0040296 | <i>Ocho</i>      | yes | no  | yes | no |
| FBgn0031829 | <i>Osm6</i>      | yes | yes | no  | no |
| FBgn0034965 | <i>ppk29</i>     | yes | yes | no  | no |
| FBgn0003250 | <i>Rh4</i>       | yes | yes | no  | no |
| FBgn0026176 | <i>SkpB</i>      | yes | yes | no  | no |
| FBgn0039251 | <i>Trf4-2</i>    | yes | yes | no  | no |
| FBgn0037225 | <i>TwlG</i>      | yes | yes | no  | no |
| FBgn0039896 | <i>yellow-h</i>  | yes | yes | no  | no |

Differential expression analysis of the MBTS genes.

\*Germline genes as referred in (24).

wt =  $w^{1118}$ ; ts1 =  $l(3)mbt^{ts1}$ ; Phf7\_ts1 =  $Phf7^{AN2}$ ;  $l(3)mbt^{ts1}$
